# Supplementary material for: Operational regional slushflow early warning
Source: Copernicus journal article supplement (doi:10.5194/nhess-2023-96), 2023-07-18
Supplement: Supplementary file [file nhess-2023-96-RC1-supplement.pdf]

Here are a few questions on minor issues mostly related to wording. The numbers refer to the lines in the pdf file:

6: Would it be better to say: „A regional early warning    for slushflow hazard....“?

44: Would be good to mention what year this slushflow occurred in Japan.

71: „Experiments with dynamic slushflows in have only.....“ Should the word „in“ be skipped? Or is something lacking in the sentence?

86: What is a „slow slushflow“ ?

105: „in a in“. One „in“ too much?

105,106: Isn't Early warning of slushflows good for settlements as well?

561: The sentence is a replication of line 550.

596: Dataset is usually one word ?

598: Establish of thresholds => establish thresholds
